# Supplementary material for: A Donor Quality Index for liver transplantation: development, internal and external validation
Source: PubMed Central journal article supplement (PMC6026153; doi:10.1038/s41598-018-27960-7), 2018-06-29
Supplement: 41598_2018_27960_MOESM1_ESM.pdf [file 41598_2018_27960_MOESM1_ESM.pdf]

# **Supplementary Information for A Donor Quality Index for liver transplantation: development, internal and external validation.**

Audrey Winter, PhD <sup>1,2,3\*</sup>, Cyrille Féray, MD PhD <sup>4</sup>, Etienne Audureau, MD, PhD <sup>5</sup>,

Daniel Azoulay, MD, PhD <sup>6</sup>, Corinne Antoine MD MSc <sup>7</sup>, Jean-Pierre

Daurès, MD PhD <sup>1,2</sup>, Paul Landais, MD PhD<sup>1</sup>

## **Supplementary Figures Legends :**

- Figure 1S – Calibration plots at month 3, 6 and 12 and their 95 band of the Cox model used to create the Donor Quality Index.
- Figure 2S – Distribution of the Donor Quality Index (DQI) for the derivation and validation datasets.
- Figure 3S – Empirical cumulative distribution functions of the Prognostic Index (PI) by risk group in the derivation and validation datasets.
- Figure 4S – Predicted survival curves in the derivation and validation dataset using the Prognostic Index (PI) and the baseline survival in the derivation dataset (without recipient covariates) with the estimated survival using Kaplan Meier curves in the validation dataset.

## **Supplementary Tables Legends :**

- Table S1 – Reasons for non-collected grafts (2009-2013).
- Table S2 – Reasons for non-transplanted grafts (2009-2013).

Table S1 – Reasons for non-collected grafts (2009-2013).

|                                             | <b>2009</b> | <b>2010</b> | <b>2011</b> | <b>2012</b> | <b>2013</b> |
|---------------------------------------------|-------------|-------------|-------------|-------------|-------------|
| Steatosis                                   | 107         | 107         | 95          | 101         | 89          |
| Chronic alcoholism                          | 73          | 66          | 64          | 72          | 76          |
| Organ removal denied                        | 54          | 46          | 61          | 69          | 51          |
| Logistic impediment                         | 39          | 39          | 42          | 43          | 38          |
| Biology (cytolysis elevated and persistent) | 39          | 29          | 36          | 35          | 34          |
| Hemodynamic instability                     | 19          | 19          | 23          | 20          | 14          |
| Opposition to organ donation                | 34          | 17          | 16          | 13          | 8           |
| Donor age                                   | 8           | 2           | 2           | 4           | 3           |
| Suspicion of tumor                          | 7           | 5           | 7           | 8           | 5           |
| Traumatism                                  | 3           | 2           | 4           | 4           | 3           |
| Other causes                                | 27          | 31          | 53          | 39          | 55          |
| Missing causes                              | 8           | 5           | 5           | 0           | 3           |
| <b>Total</b>                                | <b>418</b>  | <b>368</b>  | <b>408</b>  | <b>408</b>  | <b>379</b>  |

Table S2 – Reasons for non-transplanted grafts (2009-2013).

|                                                | <b>2009</b> | <b>2010</b> | <b>2011</b> | <b>2012</b> | <b>2013</b> |
|------------------------------------------------|-------------|-------------|-------------|-------------|-------------|
| Macroscopic steatosis (with or without biopsy) | 38          | 41          | 40          | 35          | 28          |
| Poor graft quality                             | 19          | 23          | 32          | 25          | 17          |
| Tumor (or suspicion)                           | 2           | 5           | 9           | 10          | 9           |
| Recipient cause (mainly death)                 | 1           | 1           | 0           | 3           | 1           |
| Other causes*                                  | 9           | 7           | 4           | 5           | 11          |
| <b>Total</b>                                   | <b>69</b>   | <b>77</b>   | <b>85</b>   | <b>78</b>   | <b>66</b>   |

\* logistic impediments, damaged graft, technical difficulties of surgery, anatomical difficulties, cardiac arrest during organ removal, ...)

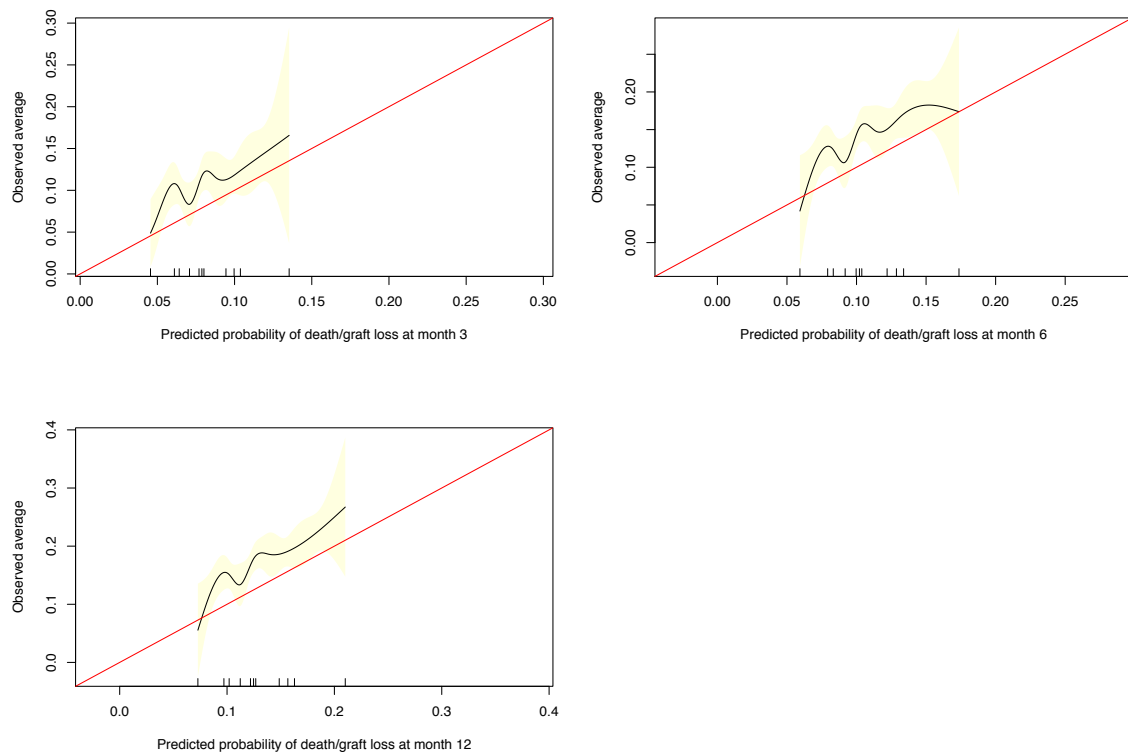

Figure 1S – Calibration plots at month 3, 6 and 12 and their 95 band of the Cox model used to create the Donor Quality Index.

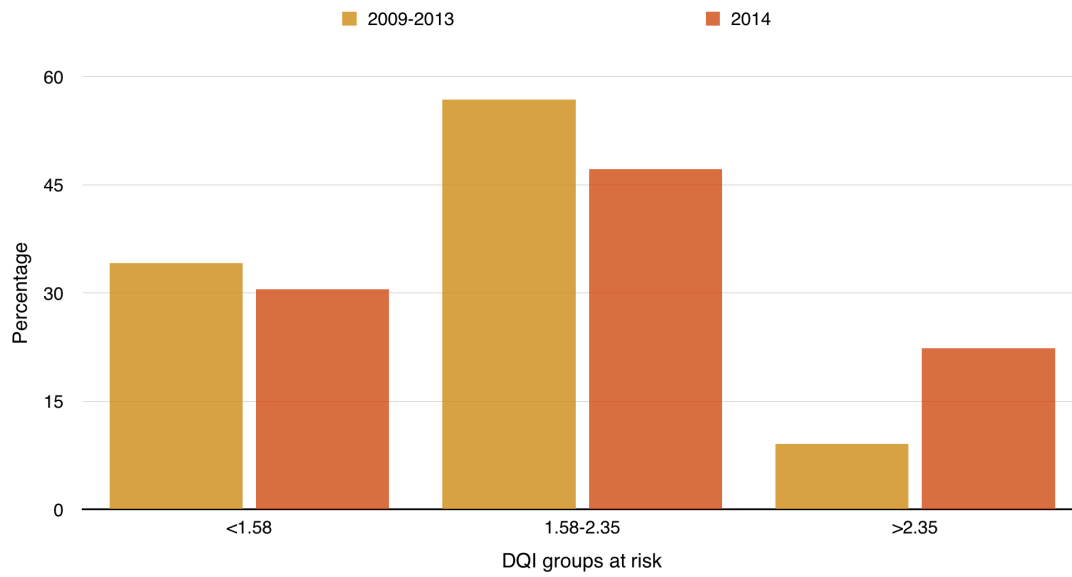

Figure 2S – Distribution of the Donor Quality Index (DQI) for the derivation and validation datasets.

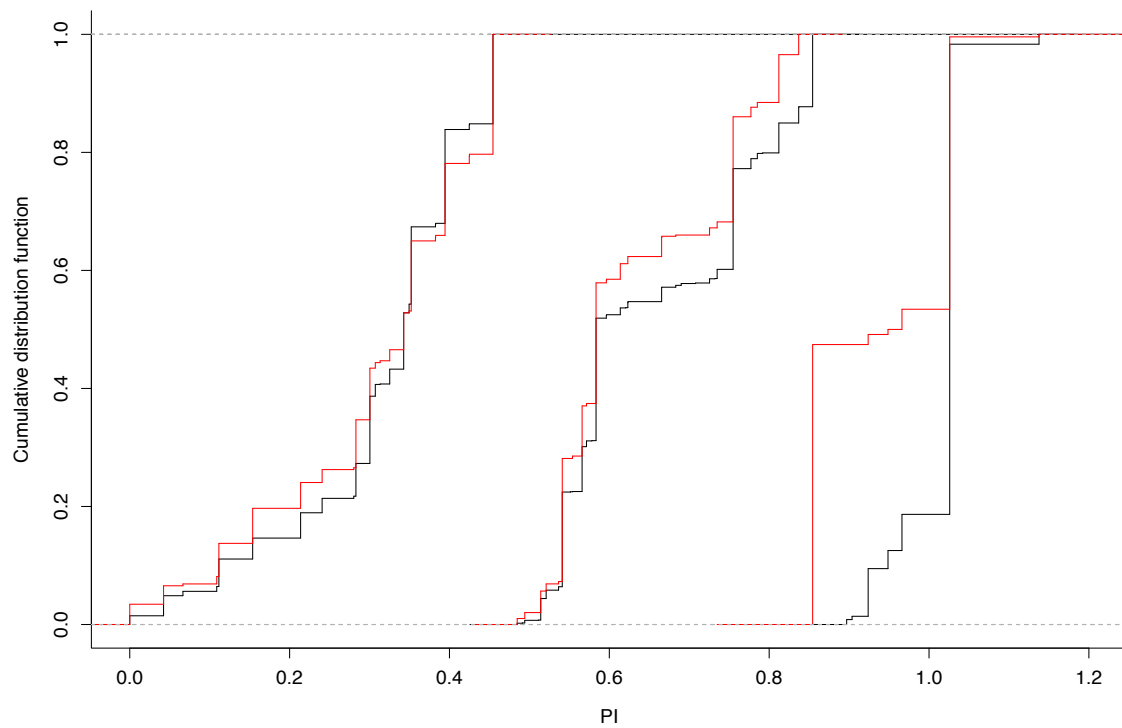

Figure 3S – Empirical cumulative distribution functions of the Prognostic Index (PI) by risk group in the derivation and validation datasets.

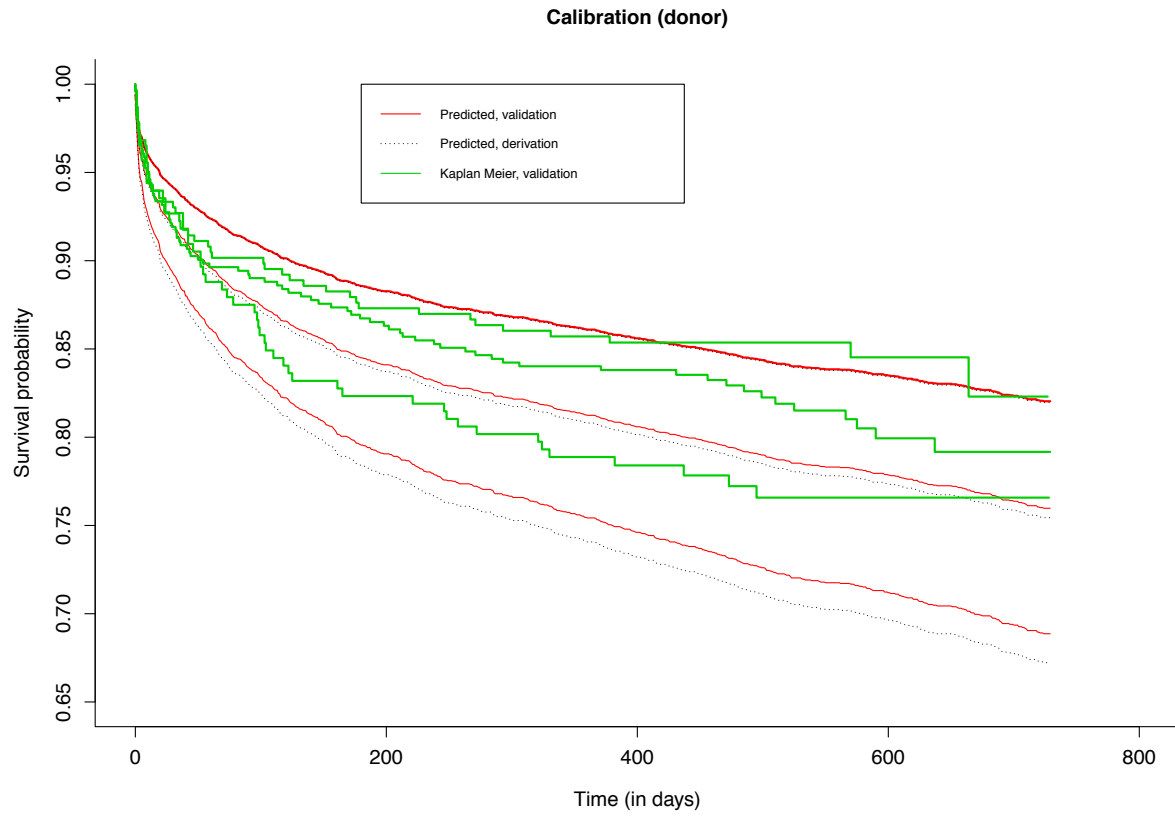

Figure 4S – Predicted survival curves in the derivation and validation dataset using the Prognostic Index (PI) and the baseline survival in the derivation dataset (without recipient covariates) with the estimated survival using Kaplan Meier curves in the validation dataset.
